# Supplementary material for: Assessment of measurement uncertainty of immunoassays and LC-MS/MS methods for serum 25-hydroxyvitamin D
Source: publisher site journal article supplement (doi:10.1515/cclm-2025-0554), 2025-08-11
Supplement: Supplementary file 1 [file j_cclm-2025-0554_suppl_014.docx]

Supplementary Table 1 : concentration of 24,25-(OH)2 vitamin D and 3-epi-25-(OH) vitamin D observed in the 17 pools and 8 single donations

|  | **24,25-(OH)2D (ng/mL) LOQ< 0.26** | **3-epi-25-(OH) D3 (ng/mL) LOQ< 1.3** |
| --- | --- | --- |
| Pool1 | <0,26 | <1,3 |
| Pool2 | 0,38 | <1,3 |
| Pool3 | 0,58 | <1,3 |
| Pool4 | 0,94 | <1,3 |
| Pool5 | 1,30 | <1,3 |
| Pool6 | 1,92 | <1,3 |
| Pool7 | 2,46 | 1,96 |
| Pool8 | 3,27 | 2,06 |
| Pool9 | 3,54 | 2,27 |
| Pool10 | 3,71 | 2,34 |
| Pool11 | 3,24 | 2,45 |
| Pool12 | 4,94 | 4,07 |
| Pool13 | 4,65 | 3,27 |
| Pool14 | 6,48 | 4,99 |
| Pool15 | 2,60 | 1,90 |
| Pool16 | 4,63 | 3,23 |
| Pool17 | 7,04 | 5,22 |
| BR1 | 1,24 | <1,3 |
| BR2 | 0,84 | <1,3 |
| BR7 | 0,99 | <1,3 |
| BR9 | 1,41 | <1,3 |
| BR10 | 0,45 | <1,3 |
| BR12 | <0,26 | <1,3 |
| BR13 | 1,13 | <1,3 |
| BR17 | 3,86 | 3,67 |
